# Supplementary material for: Effect of Coagulant and Treatment Conditions on the Gelation and Textural Properties of Acidic Whey Tofu
Source: MDPI journal article supplement (doi:10.3390/foods12050918), 2023-02-21
Supplement: s1 [file s1]

## Supplementary

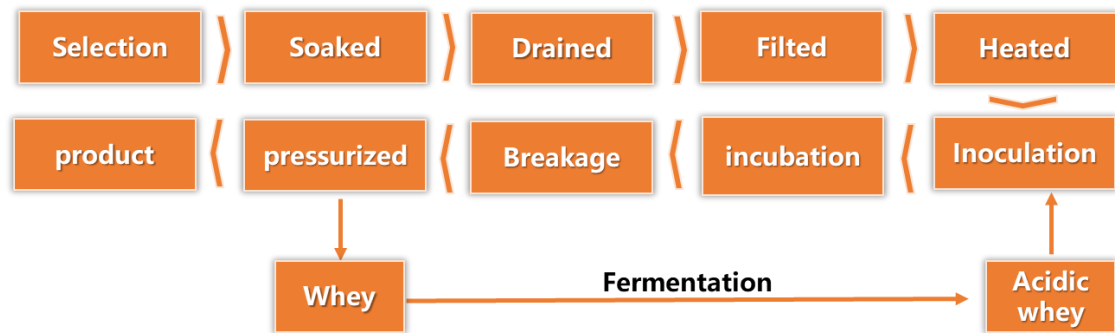

**Figure S1.** The processing procedure for the manufacture of acidic whey tofu.

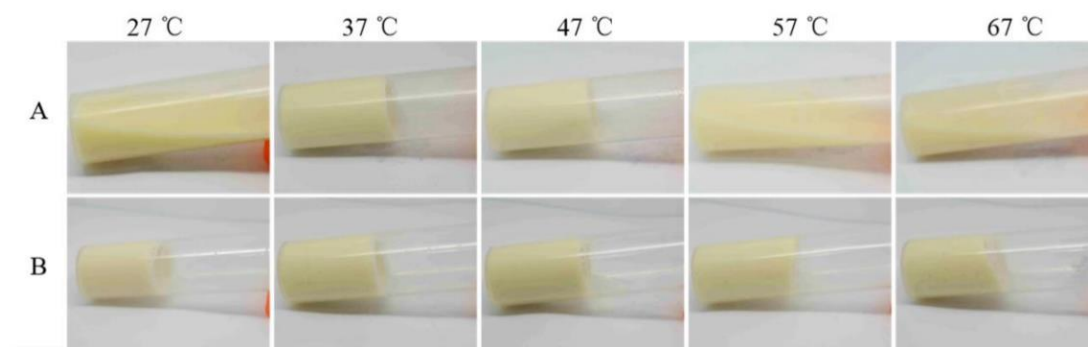

**Figure S2.** Effect of different temperatures on tofu gelatin induced by coagulant fermented using *L. paracasei* (A) and *L. plantarum* (B).

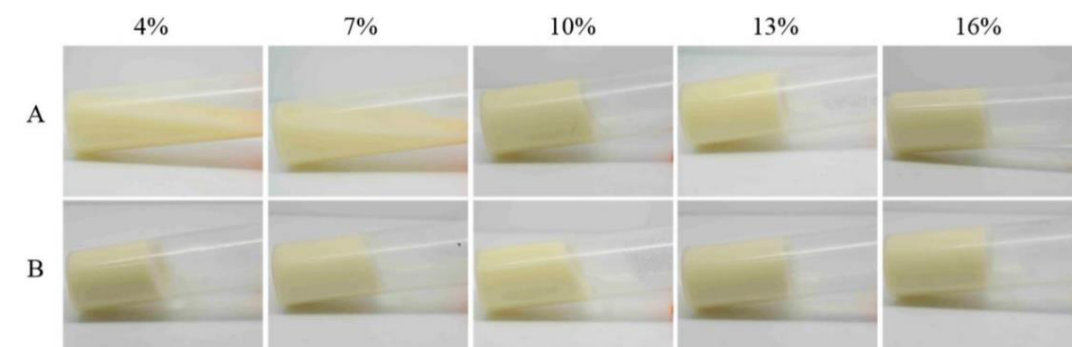

**Figure S3.** Effect of amount of coagulant fermented using *L. paracasei* (A) and *L. plantarum* (B) on tofu gelatin.

**Table S1.** Parameters of rheological properties for tofu gelatin induced by coagulant fermented using *L. paracasei* and *L. plantarum*.

| Parameter                                | <i>L. paracasei</i> | <i>L. plantarum</i> |
|------------------------------------------|---------------------|---------------------|
| Gel time/min                             | 182 ± 4             | 133 ± 2             |
| Storage modulus<br>$G'_{\max}/\text{Pa}$ | 470 ± 20            | 1250 ± 50           |
| $G' \propto \omega^n$ $n$                | 0.1156 ± 0.0003     | 0.1220 ± 0.0006     |
| $G' \propto \omega^n$ $R^2$              | 0.9985 ± 0.0004     | 0.9993 ± 0.0003     |
